# Supplementary material
Source: MDPI journal article supplement (https://www.mdpi.com/2674-1164/1/2/9)
Supplement: s1 [file s1]

# Risk factors associated with the carriage of pathogenic *Escherichia coli* in healthy commercial meat chickens in Queensland, Australia

L. Awawdeh<sup>1,2,\*</sup>, Rachel Forrest<sup>2,\*</sup>, C. Turni<sup>3</sup>, RN. Cobbold<sup>1</sup>, J. Henning<sup>1‡</sup> and J.S. Gibson<sup>1‡</sup>

1 The University of Queensland, School of Veterinary Science, Gatton, Queensland 4343, Australia, j.henning@uq.edu.au (JH); r.cobbold@uq.edu.au (RC); gibson.j@uq.edu.au (JG).

2 Eastern Institute of Technology, Hawke's Bay, 501 Gloucester Street, Taradale, Napier 4112, New Zealand; rforrest@eit.ac.nz (RF); lawawdeh@eit.ac.nz

3 The University of Queensland, Queensland Alliance for Agriculture and Food Innovation, Dutton Park, Queensland 4102, Australia cturni@optushome.com.au (CT).

\* Correspondence: lawawdeh@eit.ac.nz (L.A.); rforrest@eit.ac.nz (R.F.); Tel.: +64-6974-8000 (L.A. & R.F.)

‡ Equal senior (last) author

**Supplementary Table S1. Questionnaire for the cross-sectional study to identify risk factors associated with avian pathogenic *E. coli* on commercial broiler chicken farms in South East Queensland.**

**(Section one)**

**Details from slaughterhouse visit and farm list (To be completed by the researcher)**

1. Date of field investigation:    /    /
2. Date of slaughterhouse visit:    /    /
3. Name of poultry slaughterhouse: \_\_\_\_\_
4. Name of farm: \_\_\_\_\_
5. Farm code: \_\_\_\_\_
6. City: \_\_\_\_\_
7. Farm location saved on the GPS?    Yes ☐    No ☐  
a) If yes, farm GPS location saved as: \_\_\_\_\_
8. Elevation: \_\_\_\_\_ metres; Longitude: \_\_\_\_\_; Latitude: \_\_\_\_\_
9. Phone No: \_\_\_\_\_
10. Fax No.: \_\_\_\_\_
11. Email: \_\_\_\_\_
12. Website: \_\_\_\_\_

**Section Two**

**Farm details**

**(To be completed by the farmers/managers)**

1. Date:    /    /
2. Surname: \_\_\_\_\_ First name: \_\_\_\_\_
3. Your role on the farm: Owner / Manager / Both
4. Email: \_\_\_\_\_
5. Farm address: \_\_\_\_\_ Post code: \_\_\_\_\_
6. How chickens are currently housed (tick all boxes that might apply)?  
☐ Separate age groups housed on the farm at the same time  
☐ Same age groups housed on the farm at the same time  
☐ Other (please specify) \_\_\_\_\_
7. Where does the chickens' drinking water currently come from (tick all boxes that might apply)?  
☐ Local water utility  
☐ Well on the property  
☐ River  
☐ Other (please specify): \_\_\_\_\_

a) Is there any treatment of water currently conducted before it is given to the chickens?

Yes ☐ No ☐

If yes, how is the water treated?

8. Are there currently any vehicle tyre disinfection facilities on the farm?

Yes ☐ No ☐

9. If yes, how often are vehicle tyres disinfected by 'workers /visitors' when entering the farm?

|             | <b>Always</b>            | <b>Usually</b>           | <b>Sometimes</b>         | <b>Rarely</b>            | <b>Never</b>             | <b>Unknown</b>           |
|-------------|--------------------------|--------------------------|--------------------------|--------------------------|--------------------------|--------------------------|
| Farm worker | <input type="checkbox"/> |
| Visitors    | <input type="checkbox"/> |

10. Please specify who currently conducts the spreading service for litter used on the farm?

|                       | <b>Always</b>            | <b>Usually</b>           | <b>Sometimes</b>         | <b>Rarely</b>            | <b>Never</b>             | <b>Unknown</b>           |
|-----------------------|--------------------------|--------------------------|--------------------------|--------------------------|--------------------------|--------------------------|
| Farm worker           | <input type="checkbox"/> |
| Other, please specify | <input type="checkbox"/> |

11. Which of these methods are currently used to clean the farm (tick all the boxes that applies)?

|                                | At the removal of birds to the abattoir of each flock | At the removal of birds to the abattoir of every second flock | At the removal of birds to the abattoir of every third flock | At the removal of birds to the abattoir of every fourth flock | Other, please specify frequency |
|--------------------------------|-------------------------------------------------------|---------------------------------------------------------------|--------------------------------------------------------------|---------------------------------------------------------------|---------------------------------|
| Litter removal                 | <input type="checkbox"/>                              | <input type="checkbox"/>                                      | <input type="checkbox"/>                                     | <input type="checkbox"/>                                      | <input type="checkbox"/>        |
| Sweeping without water         | <input type="checkbox"/>                              | <input type="checkbox"/>                                      | <input type="checkbox"/>                                     | <input type="checkbox"/>                                      | <input type="checkbox"/>        |
| Pressure hose + mild detergent | <input type="checkbox"/>                              | <input type="checkbox"/>                                      | <input type="checkbox"/>                                     | <input type="checkbox"/>                                      | <input type="checkbox"/>        |
| Sanitization of the shed(s)    | <input type="checkbox"/>                              | <input type="checkbox"/>                                      | <input type="checkbox"/>                                     | <input type="checkbox"/>                                      | <input type="checkbox"/>        |
| Washing the walls              | <input type="checkbox"/>                              | <input type="checkbox"/>                                      | <input type="checkbox"/>                                     | <input type="checkbox"/>                                      | <input type="checkbox"/>        |
| Other (please, specify)        | <input type="checkbox"/>                              | <input type="checkbox"/>                                      | <input type="checkbox"/>                                     | <input type="checkbox"/>                                      | <input type="checkbox"/>        |

12. Are there other farm animal (either backyard or commercial) currently kept within 500 m to this farm?

Yes ☐

No ☐

If No, go to next question

If Yes,

| Type of farm animal | Number of animals (if known) | Distance to this farm |
|---------------------|------------------------------|-----------------------|
|                     |                              |                       |
|                     |                              |                       |
|                     |                              |                       |
|                     |                              |                       |
|                     |                              |                       |

13. Number of chicken sheds currently on the farm: \_\_\_\_\_

14. What were the maximum numbers of birds per shed within the last 12 months?

15. \_\_\_\_\_  
What were the minimum numbers of birds per shed within the last 12 months?

16. \_\_\_\_\_  
What were the average numbers of birds per shed within the last 12 months?

17. Did the mortality vary between the shed(s) within the last 12 months?

Yes ☐

No ☐

If yes,

a) What was the highest mortality rate per shed within the last 12 months?

\_\_\_\_\_

b) What was the lowest mortality rate per shed within the last 12 months?

\_\_\_\_\_

c) What was the average mortality rate per shed within the last 12 months?

\_\_\_\_\_

18. If you answered yes for Question 17, why do you think there were differences in the mortality rate between sheds?

\_\_\_\_\_

19. Total number of birds supplied to the farm from the hatchery in the last year (2013):

20. \_\_\_\_\_  
Total number of birds send to slaughter in the last year (2013): \_\_\_\_\_

21. Please specify the type of workers currently working on the farm (for example a) manger or b) causal farm worker c) other, (please specify). A worker is a person who works on the farm on daily basis or has contact with the chickens on the farm on a regular basis).

| Type of worker | Average number of days/week | Type of work | Does the farm worker own or come into contact with other | Specify the animal type and frequency of contact with animals (daily, weekly, |
|----------------|-----------------------------|--------------|----------------------------------------------------------|-------------------------------------------------------------------------------|
|                |                             |              |                                                          |                                                                               |

|  | working on the farm |  | animals (pets, or livestock) regularly?                                                      | monthly, specify other frequency) |
|--|---------------------|--|----------------------------------------------------------------------------------------------|-----------------------------------|
|  |                     |  | Yes <input type="checkbox"/> No <input type="checkbox"/><br>Unknown <input type="checkbox"/> |                                   |
|  |                     |  | Yes <input type="checkbox"/> No <input type="checkbox"/><br>Unknown <input type="checkbox"/> |                                   |
|  |                     |  | Yes <input type="checkbox"/> No <input type="checkbox"/><br>Unknown <input type="checkbox"/> |                                   |
|  |                     |  | Yes <input type="checkbox"/> No <input type="checkbox"/><br>Unknown <input type="checkbox"/> |                                   |
|  |                     |  | Yes <input type="checkbox"/> No <input type="checkbox"/><br>Unknown <input type="checkbox"/> |                                   |
|  |                     |  | Yes <input type="checkbox"/> No <input type="checkbox"/><br>Unknown <input type="checkbox"/> |                                   |

### **Section Three**

**Farm ----- shed number.....**

#### **Farm details (To be completed by the farmers/managers)**

22. Please specify any visitors that visited the farm during the period the sampled flock was present on the farm.

| Visitors              | Average frequency of visits (daily/ Weekly/monthly, as required etc.) | Reasons for visit(s) | Did the visitor own or was into contact with other animals (pets, poultry or livestock) regularly? | Specify the animal type and frequency of contact with these animals (daily, weekly, monthly, specify other frequency) |
|-----------------------|-----------------------------------------------------------------------|----------------------|----------------------------------------------------------------------------------------------------|-----------------------------------------------------------------------------------------------------------------------|
| Repairer              |                                                                       |                      | Yes <input type="checkbox"/> No <input type="checkbox"/><br>Unknown <input type="checkbox"/>       |                                                                                                                       |
| Cleaner               |                                                                       |                      | Yes <input type="checkbox"/> No <input type="checkbox"/><br>Unknown <input type="checkbox"/>       |                                                                                                                       |
| Management advisor    |                                                                       |                      | Yes <input type="checkbox"/> No <input type="checkbox"/><br>Unknown <input type="checkbox"/>       |                                                                                                                       |
| Veterinarian          |                                                                       |                      | Yes <input type="checkbox"/> No <input type="checkbox"/><br>Unknown <input type="checkbox"/>       |                                                                                                                       |
| Researcher            |                                                                       |                      | Yes <input type="checkbox"/> No <input type="checkbox"/><br>Unknown <input type="checkbox"/>       |                                                                                                                       |
| Collector of chickens |                                                                       |                      | Yes <input type="checkbox"/> No <input type="checkbox"/><br>Unknown <input type="checkbox"/>       |                                                                                                                       |

23. Have you noticed the presence of any of the following animals inside or within 300 m distance to the outside of the shed during the period the sampled flock was present on the farm?

| Type of animals | Inside the shed | Outside the shed (within 300 m distance) |
|-----------------|-----------------|------------------------------------------|
|-----------------|-----------------|------------------------------------------|

|                                              | Number of individuals | Average frequency seen<br>(daily/weekly/monthly,<br>specify other frequency) | Number of individuals | Average frequency seen<br>(daily/weekly/monthly,<br>specify other frequency) |
|----------------------------------------------|-----------------------|------------------------------------------------------------------------------|-----------------------|------------------------------------------------------------------------------|
| Rats/mice                                    |                       |                                                                              |                       |                                                                              |
| Wild birds<br>(specify)                      |                       |                                                                              |                       |                                                                              |
| Amphibians or reptiles                       |                       |                                                                              |                       |                                                                              |
| Domestic dogs                                |                       |                                                                              |                       |                                                                              |
| Domestic cats                                |                       |                                                                              |                       |                                                                              |
| Domestic ruminants<br>(cow/sheep)            |                       |                                                                              |                       |                                                                              |
| Other domestic animals (specify)<br>1.<br>2. |                       |                                                                              |                       |                                                                              |
| Stray/feral animal<br>(specify)<br>1.<br>2.  |                       |                                                                              |                       |                                                                              |
|                                              |                       |                                                                              |                       |                                                                              |
| Kangaroos                                    |                       |                                                                              |                       |                                                                              |
| Possums                                      |                       |                                                                              |                       |                                                                              |
| Other (please specify)<br>1.<br>2.<br>3.     |                       |                                                                              |                       |                                                                              |

24. Did farm workers or visitors use footbaths when entering the poultry sheds where the sampled flock was housed?

|             | Always                   | Usually                  | Sometimes                | Rarely                   | Never                    | Unknown                  |
|-------------|--------------------------|--------------------------|--------------------------|--------------------------|--------------------------|--------------------------|
| Farm worker | <input type="checkbox"/> |
| Visitors    | <input type="checkbox"/> |

a) If footbaths were used, what disinfectant was used in these foot baths specified above?

---

25. Did farm workers or visitors use overalls supplied by the farm when having contact with the chickens of the sampled flock?

|             | <b>Always</b>            | <b>Usually</b>           | <b>Sometimes</b>         | <b>Rarely</b>            | <b>Never</b>             | <b>Unknown</b>           |
|-------------|--------------------------|--------------------------|--------------------------|--------------------------|--------------------------|--------------------------|
| Farm worker | <input type="checkbox"/> |
| Visitors    | <input type="checkbox"/> |

26. Is there any shower facility located on the farm?

Yes ☐

No ☐

27. Did farm workers or visitors use the shower facility located on the farm before entering the sheds where the sampled flock was kept?

|             | <b>Always</b>            | <b>Usually</b>           | <b>Sometimes</b>         | <b>Rarely</b>            | <b>Never</b>             | <b>Unknown</b>           |
|-------------|--------------------------|--------------------------|--------------------------|--------------------------|--------------------------|--------------------------|
| Farm worker | <input type="checkbox"/> |
| Visitors    | <input type="checkbox"/> |

28. Did farm workers or visitors use hand sanitiser before entering the shed or before handling the chickens from the sampled flock?

|             | <b>Always</b>            | <b>Usually</b>           | <b>Sometimes</b>         | <b>Rarely</b>            | <b>Never</b>             | <b>Unknown</b>           |
|-------------|--------------------------|--------------------------|--------------------------|--------------------------|--------------------------|--------------------------|
| Farm worker | <input type="checkbox"/> |
| Visitors    | <input type="checkbox"/> |

a) If yes, can you please specify the type of sanitiser used?

\_\_\_\_\_

29. What is the approximate distance in metres between the car park and poultry shed where the sampled flock was kept? \_\_\_\_\_

30. Did farm workers or visitors disinfect equipment (ladder, fixing tools, etc.) before entering the shed of the sampled flock?

|             | <b>Always</b>            | <b>Usually</b>           | <b>Sometimes</b>         | <b>Rarely</b>            | <b>Never</b>             | <b>Unknown</b>           |
|-------------|--------------------------|--------------------------|--------------------------|--------------------------|--------------------------|--------------------------|
| Farm worker | <input type="checkbox"/> |
| Visitors    | <input type="checkbox"/> |

b) If so, what disinfectant was used?

31. How often was the following equipment cleaned in the shed where the sampled flock was kept?

|             | <b>Always</b>            | <b>Usually</b>           | <b>Sometimes</b>         | <b>Rarely</b>            | <b>Never</b>             | <b>Unknown</b>           |
|-------------|--------------------------|--------------------------|--------------------------|--------------------------|--------------------------|--------------------------|
| Pan feeder  | <input type="checkbox"/> |
| Water lines | <input type="checkbox"/> |

32. How frequently was litter changed where the sampled flock was kept?

| At the removal of birds to the abattoir of each flock | At the removal of birds to the abattoir of every second flock | At the removal of birds to the abattoir of every third flock | At the removal of birds to the abattoir of every fourth flock | Other, specify frequency |
|-------------------------------------------------------|---------------------------------------------------------------|--------------------------------------------------------------|---------------------------------------------------------------|--------------------------|
| <input type="checkbox"/>                              | <input type="checkbox"/>                                      | <input type="checkbox"/>                                     | <input type="checkbox"/>                                      | <input type="checkbox"/> |

33. Was the shed where the sampled flock was kept, cleaned after the litter removal?

Yes ☐

No ☐

34. Was insecticide used in the shed where the sampled flock was kept, after cleaning the shed?

Yes ☐

No ☐

a) If so, what type of insecticide was used?

35. How many birds died in the shed where the sampled flock was kept?

| Week number | number of deaths |
|-------------|------------------|
| 1           |                  |
| 2           |                  |
| 3           |                  |
| 4           |                  |
| 5           |                  |
| 6           |                  |
| 7           |                  |
| 8           |                  |
| 9           |                  |
| 10          |                  |
| 11          |                  |
| 12          |                  |

36. How frequently were dead birds removed from the shed(s) during the duration the sampled flock was kept in these sheds?



| More than twice a day    | Twice a day              | Once a day               | Every other day          | Other, specify frequency |
|--------------------------|--------------------------|--------------------------|--------------------------|--------------------------|
| <input type="checkbox"/> |

37. What was the peak density per kilogram per square metres for the shed where the sampled flock was kept?

\_\_\_\_\_

38. In which week did you reach peak density in the shed(s) where the sampled flock was kept?

\_\_\_\_\_

39. Can you describe the ammonia odour in the shed where the sampled flock were kept at peak density?

| No odour                 | Slightly annoying (faint) | Annoying (distinct)      | Very annoying (strong )  | Extremely annoying (very strong) |
|--------------------------|---------------------------|--------------------------|--------------------------|----------------------------------|
| <input type="checkbox"/> | <input type="checkbox"/>  | <input type="checkbox"/> | <input type="checkbox"/> | <input type="checkbox"/>         |

40. Can you describe the ammonia odour in the shed of the sampled flock before slaughtering?

| No odour                 | Slightly annoying (faint) | Annoying (distinct)      | Very annoying (strong )  | Extremely annoying (very strong) |
|--------------------------|---------------------------|--------------------------|--------------------------|----------------------------------|
| <input type="checkbox"/> | <input type="checkbox"/>  | <input type="checkbox"/> | <input type="checkbox"/> | <input type="checkbox"/>         |

41. What type of ventilation was used in the shed where the sampled flock was kept, please describe in detail?

\_\_\_\_\_

\_\_\_\_\_

\_\_\_\_\_

42. Were transport vehicles (for transport of chickens to the slaughterhouse) allowed to enter the farm during the sampling period?

Yes ☐ No ☐

- a) If yes, did the transport vehicles have chickens on them when they arrived at the farm?  
Yes ☐ No ☐ Sometimes ☐

**Section Five**

**Farm ----- shed number.....**

**Farm Management Details (To be completed by the farmers/managers)**

43. Were there any second grade eggs 'dirty eggs' used for the sampled flock?  
Yes ☐ No ☐

44. How many second grade eggs 'dirty eggs' were used for the sampled flock?

\_\_\_\_\_

45. What was the weekly weight of the sampled flock?

| Week number | Average weight for the sampled flock |
|-------------|--------------------------------------|
| 1           |                                      |
| 2           |                                      |
| 3           |                                      |
| 4           |                                      |
| 5           |                                      |
| 6           |                                      |
| 7           |                                      |
| 8           |                                      |
| 9           |                                      |
| 10          |                                      |
| 11          |                                      |
| 12          |                                      |

46. Was there any stress-full events occurring during the period when the sampled flock was present on the farm?

Yes ☐ No ☐

If yes, Please provide details

\_\_\_\_\_

\_\_\_\_\_

\_\_\_\_\_

**Section Six**

**Farm ----- shed number.....**

47. Has *E. coli* been diagnosed on this farm within the last 12 months?

Yes ☐ No ☐

| Clinical signs observed | Diagnostic test method(s) used | Date (estimate) | Number of death associated with <i>E. coli</i> infection |
|-------------------------|--------------------------------|-----------------|----------------------------------------------------------|
|                         |                                | __/__/__        |                                                          |
|                         |                                | __/__/__        |                                                          |

48. Has *E. coli* diagnosed on this farm in the sampled flock?

Yes ☐ No ☐

If yes, please provide details below.

| Clinical signs observed | Diagnostic test method(s) used | Date (estimate) | Number of death associated with the <i>E. coli</i> infection |
|-------------------------|--------------------------------|-----------------|--------------------------------------------------------------|
|                         |                                | __/__/__        |                                                              |
|                         |                                | __/__/__        |                                                              |

49. Have any respiratory diseases other than *E. coli* been diagnosed on this farm within the last 12 months?

Yes ☐ No ☐

If yes, please provide details below.

| Disease | Diagnostic test method(s) used | Date (estimate) | Symptoms of the disease observed |
|---------|--------------------------------|-----------------|----------------------------------|
|         |                                | __/__/__        |                                  |
|         |                                | __/__/__        |                                  |

50. Have any respiratory diseases other than *E. coli* been diagnosed on this farm in the sampled flock?

Yes ☐ No ☐

If yes, please provide details below.

| Disease | Diagnostic test method(s) used | Date (estimate) | Symptoms of the disease observed |
|---------|--------------------------------|-----------------|----------------------------------|
|         |                                | __/__/__        |                                  |
|         |                                | __/__/__        |                                  |

51. Have any antimicrobial treatments been used on this farm within the last 12 months? Yes ☐ No ☐

If yes, please provide details below.

| Type of antimicrobial used | Date (estimate) | Details (use for what problem, administration procedure etc.) |
|----------------------------|-----------------|---------------------------------------------------------------|
|                            | __/__/__        |                                                               |
|                            | __/__/__        |                                                               |

52. Where any antimicrobial treatments used on this farm in the sampled flock? Yes ☐ No ☐

If yes, please provide details below.

| Type of antimicrobial used | Date (estimate) | Details (use for what problem, administration procedure etc.) |
|----------------------------|-----------------|---------------------------------------------------------------|
|                            | __/__/__        |                                                               |
